# Supplementary material
Source: Research Square preprint supplement (doi:10.21203/rs.3.rs-8905454/v1)
Supplement: Supplementary file 1 [file b3f1dfd0902aaa8b400b4cde.docx]

| Table 1. Characteristics of included studies on AA | | | | | | |
| --- | --- | --- | --- | --- | --- | --- |
| No | Author/year | Country/Research design | Aims | Assessment methods/ Dimensions | Demographic factors | AA outcomes:  Quantitative and qualitative |
| 1 | (Yawar et al., 2024) | Pakistan/ Cross-sectional | Explored links between aging anxiety, self-esteem, physical symptoms, and quality of life. | Anxiety about Aging Scale (AAS)  (Lasher et al. ,1993)  Fear of old people, psychological concerns, physical appearance, fear of loss | N= 700  Male: 345  Female: 355  Age range:35-64  Age M (SD): 44.71 (8.35) | +: Na  -: Quality of life; physical health; physical symptomatology; psychological quality of life; social relationships; environmental quality of life. |
| 2 | (Hošnjak & Goriup, 2024) | Croatia/ Cross-sectional | Investigated ageism’s association with aging anxiety in Croatian nurses. | Anxiety about Aging Scale (AAS)  (Lasher et al. ,1993)  Fear of old people, psychological concerns, physical appearance, fear of loss | N=798  Male: 102  Female: 696  Age range: ≤ 29- ≥ 46  Age M (SD): × | +: Negative attitudes toward older adults.  -: NA |
| 3 | (Mock & Segal, 2024) | USA/ Cross-sectional | Examined relationships among clinical anxiety, aging anxiety, and death anxiety. | Anxiety about Aging Scale (AAS)  (Lasher et al. ,1993)  Fear of old people, psychological concerns, physical appearance, fear of loss | N=100  Male:51  Female: 49  Age range: 65-84  Age M (SD): 69.4 (4.2) | +: Intrapersonal problems; internalizing problems; externalizing problems; emotional dysregulation; apathy; lack of will; fantasy proneness; scrupulousness.  -: NA |
| 4 | (Matera et al., 2024) | Italy/ Cross-sectional | Studied the impact of age stereotypes on well-being in late middle age. | Anxiety about Aging Scale (AAS)  (Lasher et al. ,1993)  Fear of old people, psychological concerns, physical appearance, fear of loss | N=307  Male:95  Female:212  Age range: 50-64  Age M (SD): 56.22 (3.73) | +: NA  -: Competence stereotypes; competence meta-stereotypes; warmth meta-stereotypes; self-acceptance; personal growth; purpose in life; overall wellbeing. |
| 5 | (Gendron, Marrs, et al., 2024) | USA/ Cross-sectional | Investigated generational, internalized, and relational ageism across cohorts. | Relational Aging Anxiety Scale (Gendron et al. 2020)  Personal internalized aging anxiety, affinity for older people, relational aging anxiety | N=913  Male: 212  Female: 679  Nonbinary: 19  Missing: 3  Age range:19-88  Age M (SD): 53.9 (16.8) | +: Internalized ageism; generational discrimination.  -: Affinity toward older people. |
| 6 | (Parizian-Steinberg et al., 2024) | Israel/ Cross-sectional | Assessed factors influencing students’ willingness to work with older adults. | Anxiety about Aging Scale (AAS)  (Lasher et al. ,1993)  Fear of old people, psychological concerns, physical appearance, fear of loss | N=356  Male: 53  Female: 303  Age range: <45  Age M (SD): 25.5 (5.00) | +: NA  -: Attitudes toward working with older adults; perceived behavioural control; subjective norms; contact with older adults. |
| 7 | (Caskie et al., 2024) | USA/ Experimental study | Compared aging anxiety and emotional responses by Alzheimer’s status and gender. | Anxiety about Aging Scale (AAS)  (Lasher et al. ,1993)  Fear of old people, psychological concerns, physical appearance, fear of loss | N=291  Male: 176  Female: 115  Age range: 19-55  Age M (SD): 35.47 (8.2) | NA |
| 8 | (Kiskac et al., 2024) | Turkey/ Cross-sectional | Assessed aging anxiety in middle-aged women. | Aging Anxiety Scale for Middle-Aged Women (AASMAW)  Lee et al (2019)  Physical competence, Physical appearance, social value, negative expectations about aging | N= 240  Male: ×  Female: 240  Age range: 40- 59  Age M (SD): 46.34 (5.24) | +: Menopausal status.  -:NA |
| 9 | (Tien & Huang, 2024) | China / Cross-sectional | Identified health factors linked to aging fears in older Chinese adults. | Chinese General Social Survey  Health literacy, medical care availability, health behaviour, access to a healthy environment | N=1010  Male: 496  Female: 514  Age range: ≥ 60  Age M (SD): 70.39 (7.08) | +: Chronic disease; delayed medical treatment.  -: Lack of concern about timely treatment; lack of concern about affordability of medical care. |
| 10 | (Poon & Li, 2024) | China / Cross-sectional | Linked aging/death anxiety with self-ageism and microaggressions. | Anxiety about Aging Scale (AAS)  (Lasher et al. ,1993)  Fear of old people, psychological concerns, physical appearance, fear of loss | N=214  Male: 94  Female: 120  Age range: 30-64  Age M (SD): 50.39 (8.75) | +: Benevolent ageism; hostile ageism; self-ageism; death anxiety; hostile ageist microaggressions.  -: Benevolent ageist microaggressions. |
| 11 | (Nguyen, 2024) | Vietnam/ Cross-sectional | Assessed aging anxiety in Kinh Vietnamese adults. | Anxiety about Aging Scale (AAS)  (Lasher et al. ,1993)  Fear of old people, psychological concerns, physical appearance, fear of loss, capacity (incapable of working), personality and behavioural characteristics (being difficult and irritable) | N= 322  Male:138  Female: 184  Age range:18-59  Age M (SD): 40.17 (12.88) | +: Having cared for someone with dementia; worry about developing dementia.  -: Communication with older adults; knowing someone with dementia; correct understanding of the qualified age. |
| 12 | (Husain, Malik, et al., 2024) | Pakistan/ Cross-sectional | Identified predictors of death anxiety. | Gerascophobia or Excessive Fear of Aging Scale (Husain, 2024)  Physical appearance, feelings of uselessness, perceived loss of value, diminished social appreciation | N=2291  Male:861  Female: 1430  Age range: 18 -72  Age M (SD): 25 (×) | +: Death anxiety; worry; terror; despair; avoidance; intrusive thoughts.  -:NA |
| 13 | (Lee et al., 2024) | South Korea / Cross-sectional | Linked menopause, life satisfaction, depression, and aging anxiety. | Anxiety about Aging Scale (AAS)  (Lasher et al. ,1993)  Fear of old people, psychological concerns, physical appearance, fear of loss | N= 993  Male: ×  Female: 993  Age range:45-64  Age M (SD): × (×) | +: Smoking; physical inactivity; underweight status (BMI < 18.5); poor subjective health status; menopausal quality of life; depression.  -: Better subjective health; overweight status (BMI ≥ 25); life satisfaction. |
| 14 | (Gendron, Camp, et al., 2024) | USA/ Cross-sectional | Explored ableism’s role in aging anxiety. | Relational Aging Anxiety Scale (Gendron et al. 2020)  Affinity for older people, internalized ageism, relational ageism | N=913  Male: 212  Female: 679  Nonbinary: 19  Missing: 3  Age range: 19-88  Age M (SD): 53.9 (16.8) | +: Internalized ageism.  -: Affinity toward older people. |
| 15 | (Husain, Parveen, et al., 2024) | Pakistan/ Cross-sectional | Examined religion and aging fears in relation to death anxiety. | Brief fear of aging scale (BFA)  (Husain et al., 2024)  Physical appearance, loss of social appreciation, sense of uselessness | N= 424  Male: 353  Female: 71  Age range:26-86  Age M (SD): 50 (×) | +: Death anxiety, religious affiliation.  -:NA |
| 16 | (Akeren & Akeren, 2024) | Turkey/ Cross-sectional | Studied loneliness, social support, and fear of old age. | Fear of Old Age Scale (FOS)  (Kara et al., 2023)  Loss of independence, psychological concerns, physical appearance, social isolation, financial insecurity, fear of death | N= 611  Male: 276  Female: 335  Age range:18- 63  Age M (SD): 28.62 (10.26) | +: Loneliness; perceived social support.  -: Social support. |
| 17 | (Kikuchi et al., 2024) | USA-Japan/ Cross-sectional | Compared aging anxiety-ageism link by age in the U.S. and Japan. | Anxiety about Aging Scale (AAS)  (Lasher et al. ,1993)  Fear of old people, psychological concerns, physical appearance, fear of loss | N= 1442  Male: 797  Female: 645  Age range:18-84  Age M (SD): 44.25(16.26) | +: Ageism.  -: Learning experiences; frequency of interaction with older adults; better health status. |
| 18 | (Davis & Graf, 2024) | USA/ Cross-sectional | Assessed effects of intergenerational contact on aging anxiety and future perspective. | Anxiety about Aging Scale (AAS)  (Lasher et al. ,1993)  Fear of old people, psychological concerns, physical appearance, fear of loss | N= 276  Male: 54  Female: 222  Age range:18-28  Age M (SD): 19.62 (1.98) | +: Ageism.  -: Future time perspective; interactions with older family members; family contact. |
| 19 | (Kuball & Jahn, 2024) | Germany/ Cross-sectional | Linked social status change to aging anxiety. | Relational Aging Anxiety Scale (Gendron et al. 2020)  Personal internalized aging anxiety, affinity for older people, relational aging anxiety | N= 191  Male:125  Female: 66  Age range:65- 88  Age M (SD): 73.5 (5.75) | +: Negative affect(emotions).  -: Future social status. |
| 20 | (Bashian & Caskie, 2023) | USA / Experimental study | Studied ageism as a mediator between aging anxiety and compassion. | Anxiety about Aging Scale (AAS)  (Lasher et al. ,1993)  Fear of old people, psychological concerns, physical appearance, fear of loss | N= 292  Male: 141  Female: 151  Age range:40- 55  Age M (SD): 45.7 (4.7) | +: Ageist attitudes, emotional distance.  -: NA |
| 21 | (Hamama-Raz et al., 2023) | Israel/ Cross-sectional | Examined caregiving burden and aging anxiety in relation to resilience. | Aging Anxiety Scale (Kafer, Rakowski, Lachman, and Hickey, 1980)  Physical appearance, physical health, general anxiety about the future, financial dependence, physical disability/mobility, loss of cognitive ability or autonomy to make decisions | N=191  Male: 48  Female: 143  Age range:34- 91  Age M (SD): 61.24 (9.92) | +: Caregiving burden; negative affect (emotional states).  -: Resilience. |
| 22 | (Shimizu et al., 2023) | Japan/ Mixed methods | Assessed how youth's time perspective affects age attitudes. | Aging Anxiety Scale (Kafer, Rakowski, Lachman, and Hickey, 1980)  Physical appearance, physical health, general anxiety about the future, financial dependence, physical disability/mobility, loss of cognitive ability or autonomy | N=2494  Age range: 18-39  Study 1:  N= 1145  Age range: 18-39  Age M (SD): 31.23 (5.61)  Male: 404  Female: 741  Study 2:  N= 670  Age range: 18-39  Age M (SD): 32.66 (5.29)  Male:246  Female: 424  Study 3:  N = 679  Age range: 18-39  Age M (SD): 32.2 (5.48)  Male: 259  Female: 420 | +: Negative attitudes toward older adults; advocacy for policies supporting older adults.  -: Expectations about aging. |
| 23 | (Bodner et al., 2023) | Israel/ Cross-sectional | Linked aging anxiety, meaning in life, and distress. | Aging Anxiety Scale (Kafer, Rakowski, Lachman, and Hickey, 1980)  Physical appearance, physical health, general anxiety about the future, financial dependence, physical disability/mobility, loss of cognitive ability or autonomy to make decisions | N= 309  Male: 158  Female: 151  Age range:40- 65  Age M (SD): 53.92 (7.38) | +: Psychological distress; heightened age awareness.  -: Meaning in life. |
| 24 | (Ramsey-Soroghaye et al., 2023) | Nigeria/qualitative Study | Explored fear of aging and elder abuse. | Interview  Physical decline, loss of independence, fear of abuse and neglect, social stigma and disrespect, financial insecurity, psychological concerns | N= 30  Male:15  Female: 15  Age range: 21-42  Age M (SD): × (×) | +: Witnessing elder abuse (verbal, physical, sexual, emotional); physical decline; loss of independence; maltreatment; societal neglect.  -: Welfare policies for older adults; age-friendly housing; access to appropriate healthcare; positive outlook. |
| 25 | (Sibley et al., 2023) | Canada/ Experimental study | Studied aging-risk message framing and physical activity intentions. | Anxiety about Aging Scale (AAS)  (Lasher et al. ,1993)  Fear of old people, psychological concerns, physical appearance, fear of loss | N=253  Male:84  Female:168  Missing: 1  Age range: ×  Age M (SD): 21.1 (6.0) | NA |
| 26 | (Shacham et al., 2023) | Israel/ Cross-sectional | Linked dental anxiety and aging anxiety; tested mediators/moderators. | Aging Anxiety Scale (Kafer, Rakowski, Lachman, and Hickey, 1980)  Physical appearance, physical health, general anxiety about the future, financial dependence, physical disability/mobility, loss of cognitive ability or autonomy to make decisions | N=577  Male:282  Female: 295  Age range: 68 -87  Age M (SD): 72.78 (3.8) | +: Dental anxiety; perceived accelerated aging; poorer oral health-related quality of life.  -:NA |
| 27 | (Zhong et al., 2023) | USA/ Mixed methods | Assessed media influence on ageist views during the pandemic. | -Aging Anxiety Scale (Bousfield and Hutchinson 2010)  - Aging Anxiety Scale (Seifert, 2021)  Loss of independence, cognitive decline, physical health, social isolation | N=416  Male: 100  Female: 316  Age range: 18-55  Age M (SD): 34.4 (11.6) | +: Negative emotional reactions; willingness to work with older adults.  -: Cognitive reactions. |
| 28 | (Kranz et al., 2023) | International/ Cross-sectional | Explored perfectionism and aging anxiety in men’s baldness distress. | Anxiety about Aging Scale (AAS)  (Lasher et al. ,1993)  Physical appearance | N=355  Male:355  Female: ×  Age range: 19-64  Age M (SD): 29.43 (8.94) | +: Baldness distress, rigid perfectionism.  -: NA |
| 29 | (Kim & Ryu, 2023) | South Korea/ Observational | Analysed online gerontophobia in Korea using deep learning. | Observation  Fear of aging, social burden, social isolation, criticism of social behaviour, stereotypes about political orientations | N= 760,140  Male: ×  Female: ×  Age range: ×  Age M (SD): × | +: NA  -: NA |
| 30 | (Monroe-Lord et al., 2023) | USA/ Cross-sectional | Linked aging anxiety with physical activity types and attitudes. | Anxiety about Aging Scale (AAS)  (Lasher et al. ,1993)  Fear of old people, psychological concerns, physical appearance, fear of loss | N= 178  Male: 64  Female: 111  Other:3  Age range: 40- ≥ 70  Age M (SD): 61.5 (11.4) | +: Intention to engage in physical activity; participation in general physical activities.  -: Physical activity attitudes. |
| 31 | (Bailey & Sudha, 2022) | USA/ Mixed methods | Evaluated an empathy-based gerontology course intervention. | Anxiety about Aging Scale (AAS)  (Lasher et al. ,1993)  -Interview  Fear of old people, psychological concerns, physical appearance, fear of loss | N=197  Male: 12  Female: 185  Age range: 18-48  Age M (SD): 22.11 (4.98) | NA |
| 32 | (Hawrylyshen & Lengyel, 2022) | Manitoba/ Cross-sectional | Examined body image, weight attitudes, and aging concerns. | Body Image and Food Choice Survey  (Marshall et al, 2014)  Physical appearance | N=1083  Male: ×  Female: 1083  Age range: 50-69  Age M (SD): 60 (5.3) | +:NA  -: Appearance satisfaction. |
| 33 | (Newton et al., 2022) | Canada/ Cross-sectional | Explored women’s lived experiences of aging. | Concern with Aging (Helson and Moane, 1987; Zucker et al., 2002)  Psychological concerns, physical appearance | N=231  Male: ×  Female: 231  Age range: ×  Age M (SD): 69.06 (×) | +: Poor health status; despair; perceived non-resolution of life challenges.  -: Ego integrity; resolution; psychological wellbeing. |
| 34 | (Candrian et al., 2022) | USA/ Qualitative study | Identified healthcare barriers for older lesbian adults. | Interview  Emergence of identity vocabulary, culture of identity-hiding and coming out consequences, lack of recognition and discrimination in healthcare, channeling fear and anger into activism, concerns about aging as a lesbian, health needs, social isolation | N= 31  Male: ×  Female: 31  Age range:56-85  Age M (SD): 67.48 (8.48) | +: Sexual-orientation-based discrimination; economic insecurity; housing concerns; unmet healthcare needs; worries about care in older age; social isolation.  -:NA |
| 35 | (Palsgaard et al., 2022) | USA/ Cross-sectional | Explored ageism and its drivers among healthcare professionals. | Anxiety about Aging Scale (AAS)  (Lasher et al. ,1993)  Fear of old people, psychological concerns, physical appearance, fear of loss | N= 140  Male: 31  Female: 109  Age range: ˃18  Age M (SD): 40.3 (13.3) | +: NA  -: Physical health expectations; cognitive health expectations; mental health expectations; aging expectations; knowledge about aging. |
| 36 | (Abbasi Shavazi et al., 2022) | Iran/ Cross-sectional | Linked gender inequality to aging anxiety in women. | Anxiety about Aging Scale (AAS)  (Lasher et al. ,1993)  Fear of old people, psychological concerns, physical appearance, fear of loss | N= 405  Male: ×  Female: 405  Age range:30- 70  Age M (SD): 39.44 (7.87) | +: Perceived gender inequality; experienced gender inequality.  -: NA |
| 37 | (Gherman et al., 2022) | Romania/ Cross-sectional | Studied moral sensitivity’s role in reducing ageism and boosting career intentions. | Anxiety about Aging Scale (AAS)  (Lasher et al. ,1993)  Fear of old people, psychological concerns, physical appearance, fear of loss | N= 408  Male: 54  Female: 354  Age range:19 - ≥23  Age M (SD):  19-21: 61.88 (8.83)  ≥23: 63 (7.58) | +: Ageism; death anxiety.  -: Intention to work with older adults; frequency and quality of intergenerational contact; knowledge of aging. |
| 38 | (Sagel-cetiner & Harlak, 2022) | Turkey/ Quasi-experimental study | Evaluated effects of an Aging Psychology course on attitudes and anxiety. | Anxiety about Aging Scale (AAS)  (Lasher et al. ,1993)  Fear of old people, psychological concerns, physical appearance, fear of loss | N= 160  Male:49  Female: 111  Age range: 19-30  Age M (SD): 21.18 (1.65) | NA |
| 39 | (Caskie et al., 2022) | USA/ Experimental study | Assessed health bias in mental health trainees and moderating roles of aging anxiety. | Anxiety about Aging Scale (AAS)  (Lasher et al. ,1993)  Fear of old people, psychological concerns, physical appearance, fear of loss | N= 488  Male: 69  Female: 415  Trans-man: 1  Self-identified genders: 3  Age range:21- 66  Age M (SD): 27.8 (6.6) | +: Negative ageist attitudes.  -: Therapeutic alliance; prognosis ratings; perceived competence to treat clients; comfort treating depression; perceived client openness to treatment. |
| 40 | (Bergman & Bodner, 2022) | Israel/ Cross-sectional | Explored how self-esteem and meaning buffer aging anxiety-depression link. | Aging Anxiety Scale (Kafer, Rakowski, Lachman, and Hickey, 1980)  Physical health, general anxiety about the future, financial dependence, physical disability/mobility, loss of cognitive ability or autonomy to make decisions | N= 318  Male:167  Female: 151  Age range: 65-90  Age M (SD): 73.42 (5.4) | +: Depressive symptoms.  -: Self-rated health; self-esteem; meaning in life. |
| 41 | (Cesnales et al., 2022) | USA/ Qualitative study | Investigated student attitudes in intergenerational classrooms. | Interview  Cognitive decline, intrapersonal anxiety, social isolation | N= 61  Male: 16  Female: 45  Age range:18-50  Age M (SD): 22.61 (6.23) | NA |
| 42 | (Abdollahi et al., 2021) | Iran/ Cross-sectional | Linked healthcare providers’ attitudes to aging anxiety. | Anxiety about Aging Scale (AAS)  (Lasher et al. ,1993)  Fear of old people, psychological concerns, physical appearance, fear of loss | N= 232  Male:66  Female: 166  Age range:30-50  Age M (SD): 37.85 (6.40) | +: Prejudice.  -: Completion of a gerontology course; positive attitudes toward older adults. |
| 43 | (Bergman & Segel-Karpas, 2021) | Israel/ Cross-sectional | Studied aging anxiety, loneliness, and depression, with ageism as moderator. | Aging Anxiety Scale (Kafer, Rakowski, Lachman, and Hickey, 1980)  Physical appearance, physical health, general anxiety about the future, financial dependence, physical disability/mobility, loss of cognitive ability or autonomy to make decisions | N= 1038  Male:449  Female: 589  Age range:50- 67  Age M (SD): 58.16 (=5.22) | +: Ageism; loneliness; depressive symptoms.  -: NA |
| 44 | (Shao et al., 2021) | China/ Cross-sectional | Linked fear of aging to fraud vulnerability, moderated by self-control. | Anxiety about Aging Scale (AAS)  (Lasher et al. ,1993)  Fear of Loss | N= 251  Male: 124  Female: 127  Age range: 60-88  Age M (SD): 68.10 (6.43) | +: Intolerance of uncertainty; vulnerability to fraud.  -: Self-control. |
| 45 | (Carrard et al., 2021) | Switzerland/ Cross-sectional | Examined body image, aging anxiety, and psychological health in mid-life women. | Anxiety about Aging Scale (AAS)  (Lasher et al. ,1993)  Physical appearance | N= 331  Male: ×  Female: 331  Age range:45- 65  Age M (SD): 53.34 (5.19) | +: Depressive symptoms; importance placed on appearance; hair dyeing; likelihood of undergoing surgical and non-surgical cosmetic procedures.  -: BMI. |
| 46 | (Cooney et al., 2021) | USA/ Cross-sectional | Identified psychological/social predictors of ageist attitudes. | Anxiety about Aging Scale (AAS)  (Lasher et al. ,1993)  Fear of old people, psychological concerns, physical appearance, fear of loss | N= 419  Male:85  Female: 333  Nonbinary: 1  Age range:18- 86  Age M (SD): 46.09 (19.28) | +: Ageism; negative affect; depressive symptoms; death anxiety; self-rated current health.  -: Life satisfaction; positive affect; knowledge of aging; frequency and quality of contact with older adults; positive attitudes toward one’s own aging. |
| 47 | (Kolushev et al., 2021) | Israel/ Cross-sectional | Explored ageism among doctors/nurses and links to death fears and aging anxiety. | Aging Anxiety Scale (Kafer, Rakowski, Lachman, and Hickey, 1980)  Physical appearance, physical health, general anxiety about the future, financial dependence, physical disability/mobility, loss of cognitive ability or autonomy to make decisions | N= 431  Male:139  Female: 290  Missing:2  Age range:21-78  Age M (SD): 41.2 - 12.0 | +: Ageism.  -: NA |
| 48 | (Hwang & Kim, 2021) | South Korea/Cross-sectional | Examined how aging anxiety and past contact with older adults influenced nurses’ ageist attitudes. | Anxiety about Aging Scale (AAS)  (Lasher et al. ,1993)  Fear of old people, psychological concerns, physical appearance, fear of loss | N= 162  Male: ×  Female: 162  Age range:<29 - ≥40  Age M (SD): 35.36 (8.84) | +: Ageism.  -: Emotional intelligence; self-emotional appraisal; emotion regulation; contact with older adults; frequency and quality of contact. |
| 49 | (Lee, 2021) | South Korea / Cross-sectional | Studied how past contact and anxiety predict nurses’ ageism. | Anxiety about Aging Scale (AAS)  (Lasher et al. ,1993)  Fear of old people, psychological concerns, physical appearance, fear of loss | N= 147  Male: 67  Female: 80  Age range:60-64  Age M (SD): 52.59 (5.42) | +: NA  -: Self-esteem; self-regulation; health status; interpersonal relationships; attitudes toward aging. |
| 50 | (Adelirad et al., 2021) | Iran/ Cross-sectional | Examined factors affecting death anxiety based on gender differences. | Anxiety about Aging Scale (AAS)  (Lasher et al. ,1993)  Fear of old people, psychological concerns, physical appearance, fear of loss | N= 450  Male:203  Female: 247  Age range: 60- 89  Age M (SD): × (×)  Male: (MD: 65)  Female: (MD: 64) | +: Death anxiety; poorer mental wellbeing.  -: Quality of life, social support. |
| 51 | (Wise & Uzel, 2021) | Turkey/ cross-sectional | Identified self-esteem as key predictor of aging anxiety in mid-life. | Anxiety about Aging Scale (AAS)  (Lasher et al. ,1993)  Fear of old people, psychological concerns, physical appearance, fear of loss | N= 215  Male: 33  Female: 182  Age range:18-26  Age M (SD): 20.84 (1.43) | +: NA  -:NA |
| 52 | (Kılıçarslan & Yavuzer, 2021) | Turkey/ Qualitative study | Assessed gendered factors influencing death anxiety. | Interview  Health problems, decrease in physical power, decrease in power sources, perception of cognitive deficiency, loss of independence | N=37  Male: 15  Female: 22  Age range:65- 74  Age M (SD): 71 (×) | +: Health problems; loss of physical strength; cognitive decline; reduced economic, social, and physical resources; living alone; fear of being a burden on children.  -: NA |
| 53 | (Weber et al., 2021) | Switzerl-Germany/ Cross-sectional | Studied how intergenerational contact impacts behavioral intentions via aging anxiety. | Researcher-Designed Questions  Health conditions, physical decline, loss of close relatives, loss of independence, reduced activity, boredom, psychological concerns, approaching death, social isolation, unemployment | N= 342  Male:120  Female: 219  No answer: 3  Age range: 20-43  Age M (SD):  T1 (2006-2008): 22 (2.8)  T2 (2016-2018): 24 (3.8) | +: Psychological problems; loss of independence.  -: NA |
| 54 | (Nicol et al., 2021) | Canada/ Cross-sectional | Linked disgust sensitivity to ageism via disease vulnerability and aging anxiety. | Anxiety about Aging Scale (AAS)  (Lasher et al. ,1993)  Fear of old people, psychological concerns, physical appearance, fear of loss | N=349  Male:175  Female: 174  Age range: 18-30  Age M (SD): 25.11 (3.73) | +: Ageism; frequency and quality of contact with older adults.  -: Tension-based ageism; general disgust sensitivity; perceived vulnerability to disease. |
| 55 | (Ha & Kim, 2021) | South Korea / Cross-sectional | Assessed ageism levels among future gerontological nurses. | Anxiety about Aging Scale (AAS)  (Lasher et al. ,1993)  Fear of old people, psychological concerns, fear of loss | N= 238  Male:23  Female: 215  Age range: 18-29  Age M (SD): 20.7 (1.8) | +: Ageism.  -: Quality and frequency of contact with older adults. |
| 56 | (Wise & Onol, 2021) | Turkey / Cross-sectional | Studied grandparent closeness and contact in relation to aging anxiety. | Anxiety about Aging Scale (AAS)  (Lasher et al. ,1993)  Fear of old people, psychological concerns, physical appearance, fear of loss | N=208  Male: 31  Female: 177  Age range: 18-32  Age M (SD): 21.37 (1.9) | +: NA  -: Emotional closeness to grandparents. |
| 57 | (Kim et al., 2021) | South Korea/ Cross-sectional | Explored how older family burdens affect middle-aged adults’ aging anxiety. | Anxiety about Aging Scale (AAS)  (Lasher et al. ,1993)  Psychological concerns, physical appearance, fear of loss | N= 1,389  Male: 681  Female: 708  Age range: 51- 59  Age M (SD): 54.51 (2.55) | +: Poorer health of the unhealthiest parent/in-law; poorer financial status of the poorest parent/in-law; higher contact frequency with parents/in-laws.  -: Better cumulative parental health; better parental health when financial status is stronger. |
| 58 | (Asiret Guler Duru & Yusufoglu, 2021) | Turkey/ Cross-sectional | Investigated aging anxiety and lifestyle in nursing students. | Anxiety about Aging Scale (AAS)  (Lasher et al. ,1993)  Fear of old people, psychological concerns, physical appearance, fear of loss | N= 300  Male: 78  Female: 222  Age range:18-25  Age M (SD): 22.4 (2.2) | +: Healthy lifestyle behaviours.  -: NA |
| 59 | (Oh et al., 2020) | South Korea / Cross-sectional | Examined how social support impacts physical activity and aging anxiety. | Anxiety about Aging Scale (AAS)  (Lasher et al. ,1993)  Fear of old people, psychological concerns, physical appearance, fear of loss | N=778  Male: 433  Female: 345  Age range:55-65  Age M (SD): × | +: NA  -: Physical activity; social support. |
| 60 | (Lytle et al., 2020) | USA/ Mixed methods | Evaluated the Instapals intervention combining education and intergenerational contact. | -Aging Anxiety scale (Bousfield and Hutchinson 2010)  -Interview  Fear of death, emotional acceptance of aging, loss of independence, cognitive decline | N=14  Male:3  Female: 11  Mean age: 20.36  Age M (SD): 20.36 (1.22) | NA |
| 61 | (Lee et al., 2020) | South Korea / Cross-sectional | Tracked ageism trends in healthcare providers and students. | Anxiety about Aging Scale (AAS)  (Lasher et al. ,1993)  Fear of old people, psychological concerns, physical appearance, fear of loss | N=287  Male: 66  Female: 220  Missing: 1  Age range: ×  Age M (SD):  Medical students: 24.1 (×)  Nurses: 36.6 (×)  Physicians: 44.2 (×) | +:NA  -:NA |
| 62 | (Faudzi et al., 2020) | Malaysia / Cross-sectional | Explored age as a moderator between aging attitudes and well-being. | Anxiety about Aging Scale (AAS)  (Lasher et al. ,1993)  Fear of old people, psychological concerns, physical appearance, fear of loss | N= 911  Male:394  Female: 517  Age range: 18-60  Age M (SD): 36.63 (10.03) | +: NA  -: Well-being; life satisfaction. |
| 63 | (Zhang et al., 2020) | USA/China/ Cross-sectional | Linked aging anxiety to health; tested resilience across cultures. | -Worry Scale (Wisocki, Handen, and Morese,  1986)  - Aging Anxiety Scale (Kafer, Rakowski, Lachman, and Hickey, 1980)  Physical decline, loss of independence, financial insecurity, cognitive decline, becoming a burden | N= 824  Male: 329  Female: 495  Age range: ≥55  Age M (SD):  USA: 72.2 (9.3)  China: 67.2 (6.9) | +: Number of chronic conditions.  -: Self-rated health. |
| 64 | (Taşdemir, 2020) | Turkey/ Cross-sectional | Studied age group identity and social motives in relation to ageism and aging anxiety. | Aging Anxiety scale (Bousfield and Hutchinson 2010)  Fear of death, emotional acceptance of aging, loss of independence, cognitive decline | N= 226  Male: 87  Female: 134  Missing:5  Age range:18-25  Age M (SD): 20.42 (1.64) | +: Ageism; self-esteem; distinctiveness; belonging; meaning/purpose; efficacy; continuity; negative stereotyping; life satisfaction.  -: NA |
| 65 | (Sharma & Subramanyam, 2020) | India/ Cross-sectional | Investigated how ageism and fear of aging affect older queer men’s mental health in India. | Researcher-Designed Question  Fear of aging | N= 207  Male:207  Female: ×  Age range: 40-81  Age M (SD): 53.51 (10.92) | +: Loneliness; depressive symptoms; ageism; discriminatory behaviours on social media.  -: NA |
| 66 | (Tsao et al., 2020) | China/ Experimental study | Evaluated an aging simulation system's impact on ageist attitudes. | Anxiety about Aging Scale (AAS)  (Lasher et al. ,1993)  Fear of old people, psychological concerns, physical appearance, fear of loss | N= 36  Male:18  Female: 18  Age range:18- 35  Age M (SD): × (×) | NA |
| 67 | (Cho, 2020) | South Korea / Cross-sectional | Identified factors in successful aging among middle-aged women. | Anxiety about Aging Scale (AAS)  (Lasher et al. ,1993)  Fear of old people, psychological concerns, physical appearance, fear of loss | N= 298  Male: ×  Female: 298  Age range:40- ≥60  Age M (SD): × (×) | +: NA  -: Successful aging (social aspects); self-efficacy. |
| 68 | (Bowen et al., 2019) | Germany/ Cross-sectional | Studied predictors of dementia worry. | Aging Anxiety Scale (Kafer, Rakowski, Lachman, and Hickey, 1980)  Physical appearance, physical health, financial dependence, physical disability/ mobility, loss of social contacts, loss of cognitive ability or autonomy to make decisions | N= 219  Male:98  Female: 121  Age range: 40-94  Age M (SD):  65.50 (11.34) | +: Dementia worry; distress; perceived memory change; risk perception; perceived consequences.  -: Life satisfaction; overall current health; perceived memory capacity; perceived controllability of memory decline. |
| 69 | (Onuoha & Idemudia, 2019) | Nigeria / Cross-sectional | Linked aging anxiety, religiosity, and gender to death anxiety. | Anxiety about Aging Scale (AAS)  (Lasher et al. ,1993)  Fear of old people, psychological concerns, physical appearance, fear of loss | N= 250  Male:127  Female: 123  Age range:15- 38  Age M (SD): 21.95 (3.51) | +: Death anxiety.  -: NA |
| 70 | (Chai et al., 2019) | China/ longitudinal | Assessed student nurses' gerontology motivation using Bandura’s model. | Anxiety about Aging Scale (AAS)  (Lasher et al. ,1993)  Fear of old people, psychological concerns, physical appearance, fear of loss | N= 305  Male: 40  Female: 265  Age range:20- 26  Age M (SD): 22.91 (0.97) | +: NA  -: Career motivation toward gerontological nursing. |
| 71 | (Tomioka et al., 2019) | USA-Japan-China/ Comparative Study | Compared cultural orientation and aging anxiety among youth in Japan, China, and the U.S. | Anxiety about Aging Scale (AAS)  (Lasher et al. ,1993)  Fear of old people, psychological concerns, physical appearance, fear of loss, taking care of aging parents | N=1136  Male: 393  Female: 743  Age range:18-55  Age M (SD):  Japan: 19.12 (1.00)  China: 20.07 (1.52)  USA: 19.47 (3.13) | +: Country pattern reported: Japan and China > USA (higher aging anxiety)  -: NA |
| 72 | (Jang et al., 2019) | South Korea-USA/ Cross-sectional | Explored willingness to care for older adults among Korean and U.S. nursing students. | Anxiety about Aging Scale (AAS)  (Lasher et al. ,1993)  Fear of old people, psychological concerns, fear of loss | N= 437  Male: 67  Female: 370  Age range: ×  Age M (SD): × (×) | +: Attitude toward older adults.  -: Willingness to care for older adults; frequency and quality of contact with older adults; empathy. |
| 73 | (Donizzetti, 2019) | Italy/ Cross-sectional | Studied how knowledge, stereotypes, and anxiety predict ageism. | Anxiety about Aging Scale (AAS)  (Lasher et al. ,1993)  Fear of old people, psychological concerns, physical appearance, fear of loss | N= 886  Male: 312  Female: 574  Age range:18-65  Age M (SD): 35.82 (14.23) | +: Ageism; aging stereotypes.  -: Knowledge about aging. |
| 74 | (Ramírez et al., 2019) | Colombia/ Cross-sectional | Linked psychosocial factors and religiosity to aging expectations. | Aging Anxiety (Bousfield and Hutchinson 2010)  Fear of death, emotional acceptance of aging, loss of independence, cognitive decline | N: 544  Male: 259  Female: 285  Age range: 18-59  Age M (SD): 31.7 (11.7) | +: Negative stereotypes; expected family support  -: Religiosity. |
| 75 | (Lytle et al., 2018) | USA/ Cross-sectional | Explored aging perceptions by sexual orientation and gender. | Aging Anxiety (Bousfield and Hutchinson 2010)  Fear of death, emotional acceptance of aging, loss of independence, cognitive decline | N= 821  Male: 357  Female: 464  Age range: 45-80  Age M (SD): 55.56 (7.60) | +: Negative age stereotypes; general aging concerns.  -: Current health; positive age stereotypes. |
| 76 | (Merz et al., 2018) | USA/ Quasi-experimental | Assessed the impact of an interdisciplinary aging course on students’ knowledge and attitudes. | Anxiety about Aging Scale (AAS)  (Lasher et al. ,1993)  Fear of old people, psychological concerns, physical appearance, fear of loss | N = 78  Male: 34  Female: 44  Age range: ×  Age M (SD):  Intervention Group:18.0 (0.46)  Control Group: 18.1 (0.44) | NA |
| 77 | (Mee Kim et al., 2020) | South Korea/ Qualitative study | Investigated aging experiences in middle-aged adults with intellectual disabilities. | Interview  Financial dependence, narrower social connections, work and activity, fear of death, physical appearance, psychological concerns | N= 28  Male: 15  Female: 13  Age range: 40-≥50  Age M (SD): × (×) | +: Restricted financial autonomy; limited social networks; physical deterioration; depression; death anxiety; uncertainty about the future; living with parents.  -: Positive opportunities through work. |
| 78 | (Ayalon, 2018) | Israel/ Cross-sectional | Compared loneliness and aging anxiety in adult care and retirement communities. | Aging Anxiety Scale (Kafer, Rakowski, Lachman, and Hickey, 1980)  Physical appearance, physical health, general anxiety about the future, financial dependence, physical disability/mobility, loss of cognitive ability or autonomy to make decisions | N= 456  Male: 117  Female: 339  Age range:18-63  Age M (SD): 82.64 (15.21) | +: Loneliness; activities of daily living limitations.  -:NA |
| 79 | (Barnett & Adams, 2018) | USA/ Cross-sectional | Linked aging knowledge, contact, and fear of death to ageism/anxiety. | Anxiety about Aging Scale (AAS)  (Lasher et al. ,1993)  Psychological concerns, fear of loss | N= 623  Male: 165  Female: 458  Age range:18- 30  Age M (SD): = 20.60(2.19) | +: Death anxiety.  -: Quality of contact with older adults; optimism. |
| 80 | (Barrett & Toothman, 2018) | USA/Longitudinal | Tracked women’s aging anxiety via feminist lens. | Aging anxiety  (Barrett et al, 2008)  Declining-attractiveness anxiety, declining-health anxiety, reproductive aging anxiety | N= 905  Male: ×  Female: 905  Age range:25-74  Age M (SD): 47.05(12.46) | +: Number of chronic conditions; psychological distress; BMI; financial independence.  -: Perceived control (control over the events). |
| 81 | (Mahoney, 2018) | United Kingdom/ Cross-sectional | Identified aging anxiety predictors of disordered eating. | Anxiety about Aging Scale (AAS)  (Lasher et al. ,1993)  Fear of old people, psychological concerns, physical appearance, fear of loss | N= 200  Male: ×  Female: 200  Age range:18-39  Age M (SD): 21 (4.50) | +: Eating-disorder symptomatology (e.g., drive for thinness, body dissatisfaction, bulimia); low self-esteem; emotional dysregulation; maturity fears; interpersonal insecurity; personal alienation; interoceptive deficits; asceticism.  -: NA |
| 82 | (Bergman et al., 2018) | Israel/ Cross-sectional | Studied nearness to death and anxiety about aging/dying. | Aging Anxiety Scale (Kafer, Rakowski, Lachman, and Hickey, 1980)  Physical appearance, physical health, general anxiety about the future, financial dependence, physical disability/mobility, loss of cognitive ability or autonomy to make decisions | N= 1146  Male:490  Female: 656  Age range:45- 65  Age M (SD): 55.72 (5.29) | +: Ageism; death anxiety; dying anxiety; subjective nearness to death.  -: Self-rated health. |
| 83 | (Kim et al., 2018) | South Korea / Cross-sectional | Explored Korean baby boomers’ aging perceptions. | Anxiety about Aging Scale (AAS)  (Lasher et al. ,1993)  Fear of old people, psychological concerns, physical appearance, fear of loss | N= 1,454  Male:727  Female: 727  Age range:51-59  Age M (SD)  Husband: 55.87 (2.35)  Wife: 53.86 (2.2) | +: Spouse’s illness; child’s illness; spousal strain (self-report and partner report).  -: Parents’ illness; spousal support; focus on opportunities. |
| 84 | (Milfelner et al., 2017) | Slovenia/ Cross-sectional | Segmented cosmetic surgery attitudes. | Anxiety about Aging Scale (AAS)  (Lasher et al. ,1993)  Fear of old people, psychological concerns, physical appearance, fear of loss | N= 258  Male: ×  Female: 258  Age range:18->56  Age M (SD): × (×) | +: Positive attitudes toward cosmetic surgery.  -: NA |
| 85 | (Armitage et al., 2017) | UK/ Randomized controlled trial | Tested self-affirmation for hearing loss anxiety. | Anxiety about Aging Scale (AAS)  (Lasher et al. ,1993)  Fear of old people, psychological concerns, physical appearance, fear of loss | N= 50  Male:25  Female:25  Age range:40-90  Age M (SD): 59.92 (12.89) | NA |
| 86 | (Sözvurmaz & Mandiracioğlu, 2017) | Turkey/ Cross-sectional | Assessed aging anxiety in health students. | Anxiety about Aging Scale (AAS)  (Lasher et al. ,1993)  Fear of old people, psychological concerns, physical appearance, fear of loss | N= 236  Male: 28  Female: 208  Age range:33-92  Age M (SD): × (×) | +: Living with an older relative.  -:NA |
| 87 | (MacKinlay & Burns, 2017) | Australia/ Mixed methods | Linked spirituality to health and aging anxiety. | - Anxiety about Aging Scale (AAS)  (Lasher et al. ,1993)  -Interview  Fear of old people, psychological concerns, physical appearance, fear of loss, poor health, associated dependency, dementia, admission to residential aged care, future frailty | N=143  Male: ×  Female: ×  Age range: ×  Age M (SD): × | +: Concerns about loss of independence; cognitive decline; institutionalization; spirituality.  -: NA |
| 88 | (Shaw & Langman, 2017) | Australia/ Qualitative study | Explored older adults' views on aging and autonomy. | Interview  Freedom/liberation, loss of independence, continuity and change | N=39  Male: 19  Female: 20  Age range: 50- 92  Age M (SD): 69.28 (9.66) | +: Health decline.  -: Sense of freedom (social engagement, financial security); independence/autonomy; personal responsibility/self-care; continuity and change. |
| 89 | (Barrett & Toothman, 2016) | USA/longitudinal study | Investigated older vs. younger women’s emotional well-being. | National Survey of Midlife Development in the United States (MIDUS)  Attractiveness anxiety, physical appearance, health-related anxiety, physiological change | N = 872  Male: ×  Female: 872  Age range: 25-74  Age M (SD): × | +: Health anxiety; attractiveness anxiety.  -: Physiological change. |
| 90 | (Macdonald & Levy, 2016) | USA/ Cross-sectional | Linked aging identity and discrimination to job satisfaction. | Aging Anxiety (Bousfield and Hutchinson 2010)  Loss of independence, cognitive decline, physical health, social isolation | N=800  Male:250  Female:550  Age range: 18-75  Age M (SD): 38.94 (14.21) | +: Age discrimination.  -: Age identity; social support; job satisfaction; job engagement. |
| 91 | (Jarrott & Savla, 2016) | USA / Cross-sectional | Studied how intergenerational contact reduces aging anxiety. | Anxiety about Aging Scale (AAS)  (Lasher et al. ,1993)  Fear of old people, psychological concerns, physical appearance, fear of loss | N=457  Male: 119  Female: 338  Age range: ×  Age M (SD): 19.4(×) | +: Aging self-ambivalence.  -: Intergenerational contact; empathy; knowledge about aging. |
| 92 | (Ramírez & Palacios‐Espinosa, 2016) | Colombia/ Cross-sectional | Linked stereotypes and support to health and anxiety. | Aging Anxiety  (Bousfield and Hutchinson 2010)  Fear of death, loss of independence, cognitive decline | N=215  Male: 95  Female: 120  Age range: 44-89  Age M (SD):  Male: 60.2 (8.2)  Female: 59.2 (9.38) | +: Negative stereotypes.  -: NA |
| 93 | (Gendron & Lydecker, 2016) | USA/ Cross-sectional | Explored body image, ideals, and aging attitudes. | Anxiety about Aging Scale (AAS)  (Lasher et al. ,1993)  Fear of old people, psychological concerns, physical appearance, fear of loss | N= 485  Male: 159  Female: 326  Age range:18- 25  Age M (SD): 18.9 (1.4) | +: Ageism; body surveillance; body image avoidance; body shame.  -: NA |
| 94 | (Rittenour & Cohen, 2016) | USA/Experimental | Tested simulation’s impact on aging anxiety. | Anxiety about Aging Scale (AAS)  (Lasher et al. ,1993)  Psychological concerns | N= 139  Male: 49  Female: 90  Age range: ˂26  Age M (SD): 19.94 (1.61) | × |
| 95 | (Shrira, 2016) | Israel/ Cross-sectional | Studied trauma communication’s effect on aging views. | Aging Anxiety Scale (Kafer, Rakowski, Lachman, & Hickey, 1980)  Physical appearance, physical health, general anxiety about the future, financial dependence, physical disability/mobility, loss of cognitive ability or autonomy to make decisions | N= 450  Male:184  Female: 266  Age range:50- 67  Age M (SD): 57.5 (4.6) | +: Death anxiety; intrusive parental communication; secondary traumatization; disability.  -: Self-rated successful aging; aging satisfaction. |
| 96 | (Cheng et al., 2015) | China/ Cross-sectional | Identified factors motivating students to pursue gerontological nursing. | Anxiety about Aging Scale (AAS)  (Lasher et al. ,1993)  Fear of old people, psychological concerns, physical appearance, fear of loss | N= 916  Male:72  Female: 844  Age range:20- 27  Age M (SD): 23.9 (0.94) | +: NA  -: Motivation to choose gerontological nursing; expectancy to work with older adults; value placed on a gerontological nursing career; willingness to work with older adults. |
| 97 | (Bodner, Shrira, Bergman, & Cohen-Fridel, 2015) | Israel/ Cross-sectional | Tested emotional complexity as a buffer between death/aging anxiety and distress. | Aging Anxiety Scale (Kafer, Rakowski, Lachman, and Hickey, 1980)  Physical appearance, physical health, general anxiety about the future, financial dependence, physical disability/mobility, loss of cognitive ability or autonomy to make decisions | N= 188  Male:93  Female: 95  Age range:29-100  Age M (SD): 57.84 (17.68) | +: Death anxiety; psychological distress; cognitive difficulties.  -: NA |
| 98 | (Boswell, 2015) | USA/ Quasi-experimental | Assessed effects of aging course with service-learning on attitudes and anxiety. | Anxiety about Aging Scale (AAS)  (Lasher et al. ,1993)  Fear of old people, psychological concerns, physical appearance, fear of loss | N= 70  Male:8  Female: 62  Age range:18-38  Age M (SD): 21.33 (×) | +: NA  -: Attitudes toward older adults; quality of contact with older adults; occupational interest. |
| 99 | (Brunton & Scott, 2015) | Australia/ Cross-sectional | Analysed four dimensions of aging anxiety and influencing factors. | Anxiety about Aging Scale (AAS)  (Lasher et al. ,1993)  Fear of old people, psychological concerns, physical appearance, fear of loss | N= 348  Male: 90  Female: 258  Age range:18-88  Age M (SD): 39.73 (13.87) | +: Ageism.  -: Quality of contact with older adults; poor health. |
| 100 | (Bodner, Shrira, Bergman, Cohen-Fridel, et al., 2015) | Israel/ Cross-sectional | Linked aging and death anxiety to ageist attitudes in older adults. | Aging Anxiety Scale (Kafer, Rakowski, Lachman, and Hickey, 1980)  Physical appearance, physical health, general anxiety about the future, financial dependence, physical disability/mobility, loss of cognitive ability or autonomy to make decisions | N= 1073  Male: 477  Female: 596  Age range:50- 86  Age M (SD): 58.15 (5.32) | +: Ageism; death anxiety; disability; chronic medical conditions.  -:NA |
| 101 | (Perales-Blum et al., 2014) | Mexico / Case Report | Reported a case of gerascophobia and evaluated treatment. | Eating Disorder Inventory (EDI)  Fear of Body Development, development of secondary sexual characteristics, fear of maturity | N=1  Male :1  Female: ×  Age: 14  Age M (SD): 14 (0) | NA |
| 102 | (Brinker et al., 2014) | Australia/ Quasi-experimental | Evaluated The Game of Late Life to reduce aging anxiety via simulation. | Anxiety about Aging Scale (AAS)  (Lasher et al. ,1993)  Fear of old people, psychological concerns, physical appearance, fear of loss | N= 264  Male: 65  Female: 199  Age range:17- 57  Age M (SD):  Study 1  Intervention group: 20.14 (×)  control group: 20.04 (×)  Study 2  Age M (SD): 19.68 (1.93) | NA |
| 103 | (Kessler et al., 2014) | Germany/ Cross-sectional | Explored how work stress and distress impact aging anxiety and dementia worry. | Aging Anxiety Scale (Kafer, Rakowski, Lachman, and Hickey, 1980)  Physical health, general anxiety about the future, financial dependence, physical disability/mobility, loss of cognitive ability or autonomy to make decisions | N= 68  Male:6  Female: 62  Age range: 19-59  Geriatric nurse  Age M (SD): 37.15 (10.27)  Geriatric nurse  Age M (SD): 40.61 (10.32) | +: Dementia worry frequency; dementia worry intensity; psychological distress.  -:NA |
| 104 | (Koukouli et al., 2014) | Greece/ Comparative Study | Validated the Anxiety about Aging Scale. | Anxiety about Aging Scale (AAS)  (Lasher et al. ,1993)  Fear of old people, psychological concerns, physical appearance, fear of loss | N=320  Age range:18-65  Male: 107  Female: 213  Professions: 147  Age M (SD): × (×)  Students: 74  Age Md (SD): 21-25 (×)  Community Residents: 99  Age M (SD): 32.8 (×) | +: Group differences reported: students > professionals/community residents (higher aging anxiety).  -: NA |
| 105 | (Drury et al., 2016) | UK/Cross-sectional | Studied intergenerational contact effects on youth attitudes and anxiety. | Anxiety about Aging Scale (AAS)  (Lasher et al. ,1993)  Psychological concerns, fear of loss | Study 1: (n=70)  Male: 38  Female:32  No answer: 1  Age range:18- 25  Age M (SD): 21.16 (2.12)  Study 2: (n=110)  Male: 41  Female:68  Age range:18- 25  Age M (SD): 21.21 (2.12)  Study 3: (n=95)  Male: 61  Female:34  Age range:18- 30  Age M (SD): 24.52 (3.29) | +: Intergroup anxiety.  -: Contact quality; extended contact; attitudes toward older adults; ingroup norms. |
| 106 | (Prior & Sargent-Cox, 2014) | Australia/ Experimental study | Tested imagined contact for improving aging expectations in students. | Anxiety about Aging Scale (AAS)  (Lasher et al. ,1993)  Fear of old people, psychological concerns, physical appearance, fear of loss | N= 201  Male:78  Female: 123  Age range:18-29  Age M (SD): 21.21 (2.31) | NA |
| 107 | (Allan et al., 2014) | Canada / Cross-sectional | Linked personality, empathy, and gratitude to ageism and anxiety. | Anxiety about Aging Scale (AAS)  (Lasher et al. ,1993)  Fear of old people, psychological concerns, physical appearance, fear of loss | N= 392  Male: 140  Female: 252  Age range: ×  Age M (SD): × (×) | +: Neuroticism.  -: Frequency of contact with older adults; gratitude; empathic concern; perspective taking; agreeableness; conscientiousness. |
| 108 | (Chonody et al., 2014) | Australia/ Cross-sectional | Explored fear of interaction with older adults via Terror Management Theory. | Researcher-Designed Questions  Self-perception of personal aging | N=441  Male: 53  Female: 298  Missing: 90  Age range:18-78  Age M (SD): 39.54 (15.31) | +: Fear of older people; negative ageism; death anxiety.  -: Positive ageism; contact with older adults. |
| Note: M: Mean, MD: Median, +: AA has positive relationship to factors, -: AA has negative relationship to factors | | | | | | |
